# Supplementary material for: A new class of boron nitride fibers with tunable properties by combining an electrospinning process and the polymer-derived ceramics route
Source: Royal Society of Chemistry journal article supplement (doi:10.1039/b9nr00185a), 2009-11-05
Supplement: b9nr00185a.pdf [file b9nr00185a.pdf]

## Supplementary information

### Experimental section

#### Materials

All preparation steps were carried out in a purified argon atmosphere passing through successive columns of BTS-catalyst and potassium hydroxide by means of standard Schlenk manipulations and vacuum/argon-line techniques. Schlenks were dried at 120 °C overnight before pumping under vacuum and filling them with argon. Manipulation of polymer samples were made inside an argon-filled glove box (Jacomex BS521) dried with potassium hydroxide. PAN (polyacrylonitrile) was obtained from Sigma-Aldrich, average Mw = 150,000. DMF (N,N-Dimethylformamide) was obtained from Sigma-Aldrich (extra-dry, water < 50 ppm). PAN and DMF were used without further purification.

#### Characterization

Thermogravimetric analysis (TGA) of the polymer-to-ceramic conversion was recorded on a Setaram TGA 92 16.18. Experiments were performed in ammonia atmosphere at 0.8 °C/min from 25 to 1000 °C (dwelling time of 2 h) using silica crucibles (sample weight of ~ 40 mg) at ambient atmospheric pressure. Chemical analyses of the poly[B-(methylamino)borazine] were made at the *Service Central de Microanalyse du CNRS* (Vernaison, France). The Fourier transform infrared spectrum (FT-IR) of the poly[B-(methylamino)borazine] was obtained from a Nicolet Magna 550 Fourier transform-infrared spectrometer in a KBr matrix (dried at 120 °C in air). In contrast, infrared spectroscopy of fibers pyrolyzed at 1000 °C and those prepared at 1800 °C was taken with a Nicolet 380 FT-IR spectrometer coupled with the Attenuated Total Reflectance (ATR) accessory. Scanning electron microscopy (SEM, Hitachi S-4800 operating at 15 kV) was used to observe at room temperature the morphology green fibers, fibers pyrolyzed at 1000 °C and those prepared at 1800 °C. Fibers were mounted on stainless pads and, due to the insulating properties of samples, the samples were sputtered with ~10 Å of a Pd/Au mixture to prevent charging during observation. Fibers prepared at 1800 °C were analyzed by Energy-Dispersive X-ray (EDX). An EDX system EDAX Genesis 4000 coupled with a SEM (Hitachi S-4800) was used to quantify boron, nitrogen, oxygen and carbon elements. Fibers prepared at 1000 °C and those obtained at 1800 °C were characterized and analyzed by a transmission electron microscopy (TEM) with a TOPCON 002B working at 200 kV.

#### Polymer solution preparation

The operating procedure to prepared the poly[B-(methylamino)borazine] was previously reported in our paper [*See ref 16 in the paper*].

IR data (KBr pellets, cm<sup>-1</sup>): 3434 (m); 2958 (w) 2928 (w), 2898 (w), 2820 (m); 1597 (s); 1515 (s); 1460 (s); 1411 (s); 1178 (s); 1095 (m), 707 (w). <sup>11</sup>B NMR (96.29 MHz, C<sub>6</sub>D<sub>6</sub>, ppm): 25.7 (br); <sup>1</sup>H NMR (300 MHz, CD<sub>2</sub>Cl<sub>2</sub>, ppm): 1.86 br (-N(H)CH<sub>3</sub>); 2.47 vbr (-N(H)CH<sub>3</sub>); 2.56 vbr (Bridging -N(CH<sub>3</sub>-); 2.70-4.10 br (N(H) borazine). <sup>13</sup>C NMR (75 MHz, CD<sub>2</sub>Cl<sub>2</sub>, ppm) 27.6, 27.9 (-N(H)CH<sub>3</sub>); 31.2 (Bridging -N(CH<sub>3</sub>-).

PAN was first dissolved at 70°C for 12 hours under a vigorous stirring in DMF to obtain a solution with PAN concentration in the range 8-12 wt%.

The poly[B-(methylamino)borazine] was also dissolved in DMF and then filtered to give a clear solution. The DMF was then evaporated from this solution to lead to a dry solid Poly[B-(methylamino)borazine], soluble in DMF.

Solid Poly[B-(methylamino)borazine] was finally added, at room temperature (RT) under flowing argon, to a PAN-DMF solution respecting a Poly[B-(methylamino)borazine]:PAN weight ratio varying from 0.1 to 0.8.

### Electrospinning process

A clean and air-purged 5-mL Luer-Lock Tip syringe was equipped with a 21-gauge needle and loaded with the suitable Poly[B-(methylamino)borazine]-PAN-DMF solution. As described on Figure S1, the high voltage power was directly applied between the stainless-steel needle (positive electrode) and the metallic target (grounded electrode). The polymer flow rate is controlled using a syringe-pump (KDS 100) and set at  $1 \text{ mL h}^{-1}$ . The working distance of 10 cm was measured between the needle tip and the metallic target. It must be mentioned that the electrospinning experiments were performed in special nitrogen-filled box to prevent from polymer hydrolysis (water  $< 0.1 \%$ ).

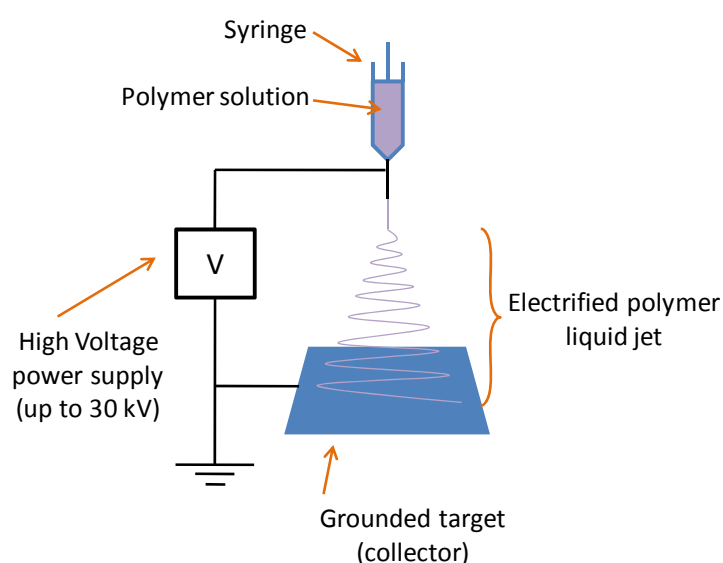

**Figure S1.** Scheme of the electrospinning set-up.

### Polymer-to-ceramic conversion.

The targets supporting as-electrospun fibers were transferred into a silica tube inserted in a horizontal tube furnace (Gero) connected to a glove-box avoiding contamination of the samples with air and moisture. The tube was pumped under vacuum and refilled with ammonia ( $\text{H}_2\text{O} < 1 \text{ ppm}$ ,  $\text{O}_2$  and  $\text{Ar} < 1 \text{ ppm}$ ). Subsequently, samples were subjected to a cycle of ramping of  $0.8 \text{ }^\circ\text{C min}^{-1}$  to  $1000 \text{ }^\circ\text{C}$ , dwelling there for 2 h, and then cooling down to RT at  $5 \text{ }^\circ\text{C min}^{-1}$  under nitrogen. A constant flow ( $90 \text{ mL min}^{-1}$ ) of ammonia was passed through the tube. Then, ammonia-treated samples were introduced in a graphitic furnace (Gero Model HTK 8) which was subsequently pumped then refilled with nitrogen to be heated through a cycle of ramping of  $5 \text{ }^\circ\text{C min}^{-1}$  to  $1800 \text{ }^\circ\text{C}$ , dwelling there for 2 h, and then cooling down to RT at  $10 \text{ }^\circ\text{C min}^{-1}$ . A constant flow ( $200 \text{ mL min}^{-1}$ ) of nitrogen was passed through the furnace.

## EDX experiments

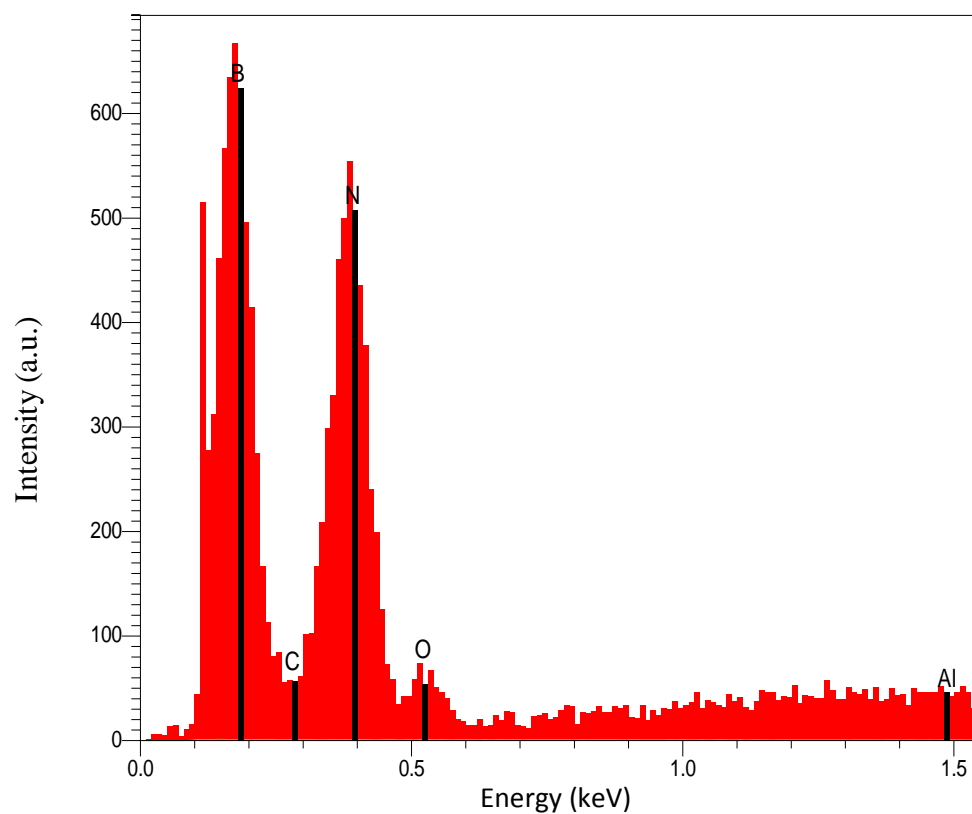

**Figure S2.** Electron Dispersive X-ray Analysis performed on fibers after annealing at 1800 °C under N<sub>2</sub>.
